# Supplementary material
Source: PubMed Central journal article supplement (PMC7876695)
Supplement: ao0c04691_si_001.pdf [file ao0c04691_si_001.pdf]

## Supporting Information for Publication

### Specific and Rapid SARS-CoV-2 Identification Based on LC-MS/MS analysis

Ofir Schuster<sup>1\*#</sup>, Anat Zvi<sup>2</sup>, Osnat Rosen<sup>3</sup>, Hagit Achdout<sup>1</sup>, Amir Ben-Shmuel<sup>1</sup>, Ohad Shifman<sup>2</sup>, Shmuel Yitzhaki<sup>4</sup>, Orly Laskar<sup>1</sup> and Liron Feldberg<sup>5\*#</sup>

<sup>1</sup> Department of Infectious Diseases, Israel Institute for Biological Research, Ness Ziona, Israel

<sup>2</sup> Department of Biochemistry and Molecular Genetics, Israel Institute for Biological Research, Ness Ziona, Israel

<sup>3</sup> Department of Biotechnology, Israel Institute for Biological Research, Ness Ziona, Israel

<sup>4</sup> Israel Institute for Biological Research, Ness Ziona, Israel

<sup>5</sup> Department of Analytical Chemistry Israel Institute for Biological Research, Ness Ziona, Israel

\* Corresponding author

# Equal contribution

#### **Figure S1: S and N proteins sequences and their predicted tryptic peptides**

##### **S protein**

MFVFLVLLPLVSSQCVNLTR**TQLPPAYTNSFTR****RGVYYPDK**VFRSSVLHSTQDLFLPFFSN  
VTWFHAIHVSNGTKRFDNPVLPFNDGVYFASTEKSNIIR**GWIFGTTLDSK**TQSLLI VNN  
ATNVVIKVCFEQFCNDPFLGVYYHKNNK**SWMESEFR**VYSSANNCTFEYVSQPFLMDLEGKQ  
GNFKNLREFVFK**NIDGYFK**IYSK**HTPINLVR**DLPQGFSALEPLVDLPIGINITR**FQTLAL**  
**HR**SYLTPGDSSSGWTAGAAAYVGYLQPRFTLLKYNENGTITDAVDCALDPLSETKCTLK**S**  
**FTVEK****GIYQTSNFR****VQPTESIVR**FPNITNLCPFGEFNATR**FASVYAWNR**KRISNCVADYSV  
LYNSASFSTFK**CYGVSPK**LNDLCFTNVYADSFVIRGDEV**QIAPGQTGK****IADYNYK**LPDD  
FTGCVIAWNSNNLDSK**VGGNYNYLYR**LFRK**SNLKPFR**DI STEIYQAGSTPCNGVEGFNCF  
PLQSYGFQPTNGVGYQPYRVVLSFELLHAPATVCGPKK**STNLVK**NKCVNFNFNGLTGTGV  
LTESNKK**FLPFQQFGR****DIADTTDAVR**DPQTL EILDITPCSFGGVS VITPGTNTSNQVAVLY  
QDVNCTEVPVAIHADQLTPTWR**VYSTGSNVFQTR**AGCLIGAEHVNNSYECDIPIGAGICAS  
YQTQTN SPRRARSVASQSIIAYTMSLGAENSVAYSNSIAIPTNFTISVTTEILPVSMTKT  
SVDCTMYICGDSTEC SNLLLQYGSFCTQLNR**ALTGIAVEQDK****NTQEVFAQVK**QIYKTPPIK  
DFGGFNFSQILPDP SKPSKR**SFIEDLLFNK****VTLADAGFIK****QYGDCLGDIAAR****DLICAQK**FN  
GLTVLPPLLTDEMIAQYTSALLAGTITSGWTFGAGAALQIPFAMQMAYRFNGIGVTQNVLY  
ENQK**LIANQFNSAIGKI****QDSLSTASALGK**LQDVVNQNAQALNTLVKQLSSNFGAISSVLN  
DILSRDK**VEAEVQIDR**LITGR**LQSLQTYVTQQLIR**AAEIR**ASANLAATK****MSECVLGQSK**R  
**VDFCGK**GYHLMSFPQSAPHGVVFLHVTVYVPAQEK**NFTTAPAICHGK**AHFPRREGV FVSNGT  
HWFVTQRNFYEPQIITDNTFVSGNCDVIGIVNNTVYDPLQPELDSFKEELDKYFKNHTS  
PDVDLGDISGINASVVNIQKEIDR**LNEVAK****NLNESLIDLQELGK**YEQYIKWPWYIWLGFIA  
GLIAIVMVTIMLCCMTSCCSCLKGCCSCGSCCKFDEDDSEPV LKGVKLHYT

## N protein

**MSDNGPQNQR**NAPRITFGGSPDSTGSNQNNGERSGARSKQRRPQGLPNNTASWFTALTQHGK  
EDLKFFPRGQGVPIINTNSSPDDQIGYRRATRIRIRGGDGKMKDLSPRWYFYLLGTGPEAGLP  
YGANKDGI I WVATEGALNTPK **DHIGTR**NPANNAIIVLQLPQGTTLPK **GFYAEGSRGGSQAS**  
**SR**SSSRSRNSSR **NSTPGSSR****GTSPAR**MAGNGGDAALALLLLDR **LNQLESK**MSGK **GQQQQGQ**  
**TVTK****KSAAEASK**KPRQKRTATK **AYNVTQAFGR**RGPEQTQGNFGDQELIR **QGTDYK**HWPQIA  
QFAPSASAFFGMSRIGMEVTPSGTWLTYTGAIKLDKDPNFK **DQVILLNK****HIDAYKTFPPT**  
**EPK**KDKKKK **ADETQALPQR**QKKQQVTLLPAADLDDFSK **QLQSMSSADSTQA**

**Figure S1:** The predicted peptides following tryptic digest presented on top of the parental spike protein (A) and nucleocapsid protein (B). All peptide sequences are shown in bold and are underlined; highlighted in yellow are peptides specific to SARS-CoV-2 or SARS. Cleavage sites are highlighted in blue. Proteins sequence origins: GenPept QHD43416 and GenBank accession YP\_009724397.2, for S and N proteins, respectively (see materials and methods, section 3.2).

## Figure S2: SARS-CoV-2 kinetic profile

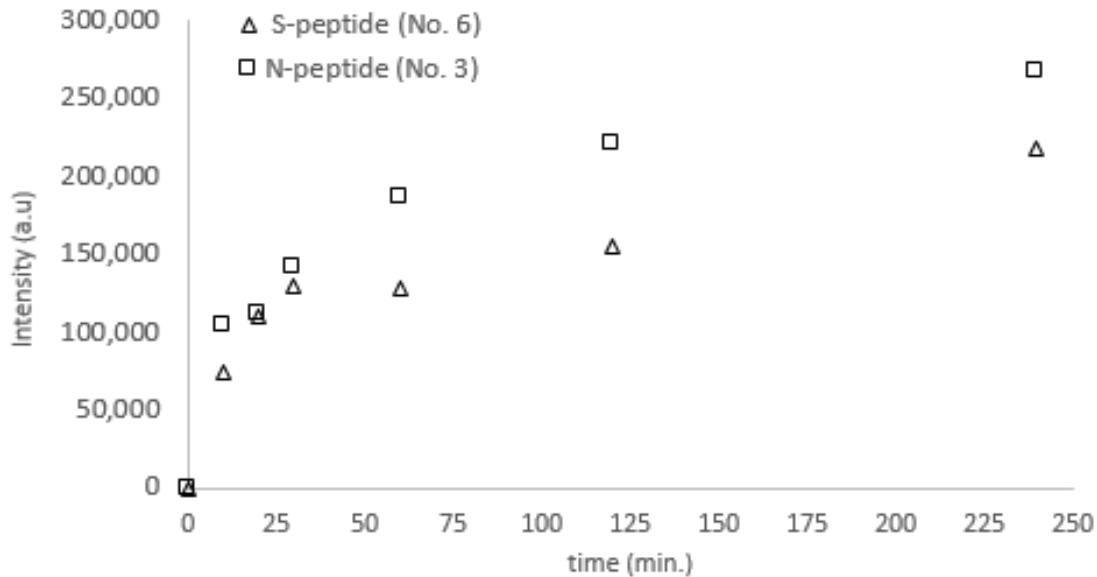

**Figure S2:** Kinetic profiles for tryptic digest of SARS-CoV-2 of a representative marker for S protein and N protein (peptides number 6 and 3, respectively). In each profile, each point represents the intensity at a specific time point.

**Figure S3:** LC-MS/MS chromatogram and spectrum of a representative marker

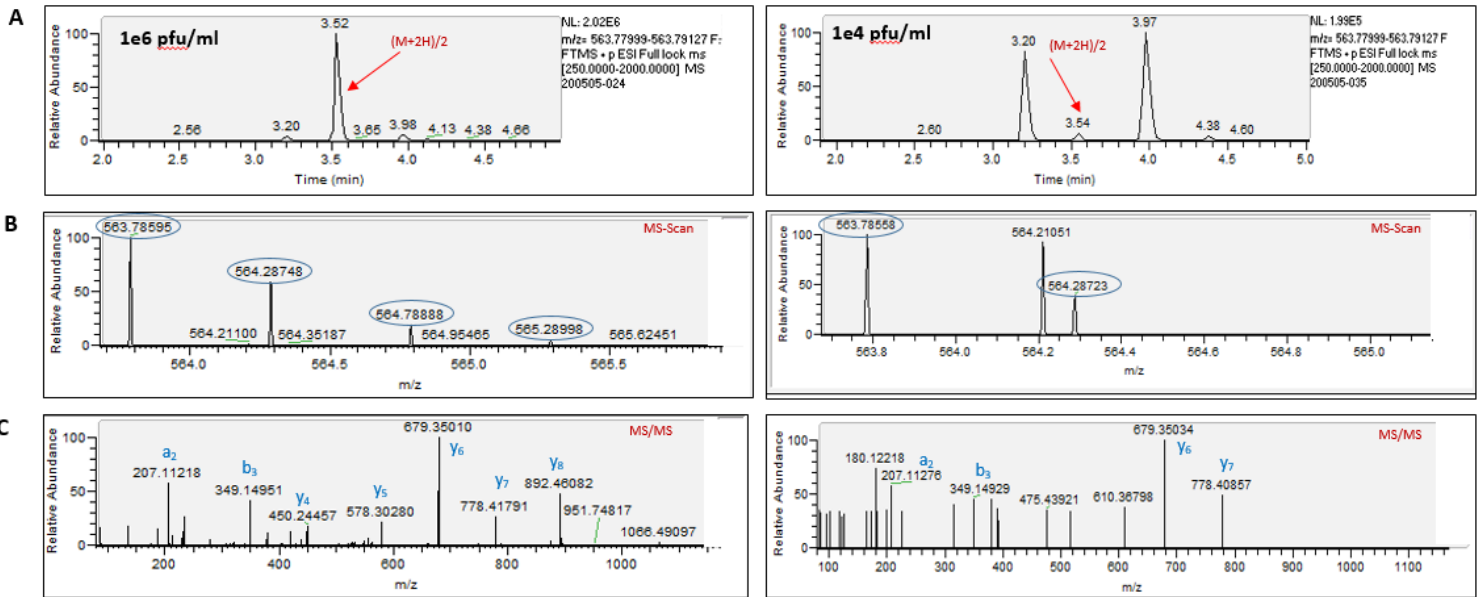

**Figure S3:** Identification of SARS-COV-2 representative marker, derived from N protein (AYNVTQAFGR). For SARS-CoV-2 identification will be required a specific marker with proper chromatographic retention time, accurate masses (< 2ppm) and at list two MS/MS fragments. (A) Extracted ion chromatogram (EIC) of m/z 563.7856 from full scan LC-MS run of SARS-CoV-2 after precipitation (1e6 PFU/ml-left and 1e4 PFU/ml-right). (B) Mass spectrum of the expected chromatographic peak (mass accuracy< 2ppm. 1e6 PFU/ml-left and 1e4 PFU/ml-right). (C) MS/MS spectrum of m/z 563.7856 (7 identified fragments in 1e6 PFU/ml- left, 4 identified fragments in 1e4 PFU/ml- right).

**Table S1:** LC-MS analysis of N protein markers

| Peptide No. | Tryptic peptide | Molecular ion (Multiple charge) | Retention time (min) | Purified N protein |               |             | Cell-cultured SARS-CoV-2 |               |                                  | SARS-CoV-2 precipitation |               |                                  |
|-------------|-----------------|---------------------------------|----------------------|--------------------|---------------|-------------|--------------------------|---------------|----------------------------------|--------------------------|---------------|----------------------------------|
|             |                 |                                 |                      | Signal Intensity   | Precision (%) | Linearity   | Signal Intensity         | Precision (%) | Linearity (PFU/ml)               | Signal Intensity         | Precision (%) | Linearity (PFU/ml)               |
| 1           | GQQQQGQIVTK     | 601.8098 (M+2H)/2               | 2.3                  | 4.8e6              | 11            | 10ppb-10ppm | 3.1e4                    | 5             | 10 <sup>5</sup> -10 <sup>6</sup> | 4.0e5                    | 8             | 10 <sup>4</sup> -10 <sup>6</sup> |
| 2           | ADETQALPQR      | 564.78583 (M+2H)/2              | 2.8                  | 4.7e6              | 13            | 10ppb-10ppm | 4.0e4                    | 2             | 10 <sup>5</sup> -10 <sup>6</sup> | 3.8e5                    | 11            | 10 <sup>4</sup> -10 <sup>6</sup> |
| 3           | AYNVTQAFGR      | 563.78563 (M+2H)/2              | 3.5                  | 2e7                | 28            | 10ppb-10ppm | 2.1e5                    | 9             | 10 <sup>4</sup> -10 <sup>6</sup> | 1.9e6                    | 12            | 10 <sup>3</sup> -10 <sup>6</sup> |
| 4           | DQVILLNK        | 471.7845 (M+2H)/2               | 3.5                  | 8e6                | 30            | 10ppb-10ppm | 9.7e4                    | 20            | 10 <sup>4</sup> -10 <sup>6</sup> | 6.7e5                    | 8             | 10 <sup>4</sup> -10 <sup>6</sup> |
| 5           | TFPPTPEPK       | 458.7423 (M+2H)/2               | 3.3                  | 1.5e7              | 22            | 10ppb-10ppm | 7.8e4                    | 3             | 10 <sup>5</sup> -10 <sup>6</sup> | 7.8e5                    | 13            | 10 <sup>4</sup> -10 <sup>6</sup> |
| 6           | GFYAEGSR        | 443.7063 (M+2H)/2               | 2.9                  | 1.4e7              | 22            | 10ppb-10ppm | 1.4e5                    | 8             | 10 <sup>4</sup> -10 <sup>6</sup> | 6.8e5                    | 30            | 10 <sup>4</sup> -10 <sup>6</sup> |
| 7           | NSTPGSSR        | 403.1935 (M+2H)/2               | 1.9                  | 7e6                | 15            | 10ppb-10ppm | 2.2e4                    | 3             | 10 <sup>5</sup> -10 <sup>6</sup> | 1.9e5                    | 4             | 10 <sup>4</sup> -10 <sup>6</sup> |
| 8           | GGSQASSR        | 375.1804 (M+2H)/2               | 1.2                  | 2.6e5              | 4             | —           | 2.5e3                    | 30            | —                                | 5.8e4                    | 14            | 10 <sup>5</sup> -10 <sup>6</sup> |

**Table S1:** LC-MS analysis of tryptic peptides derived from the Nucleocapsid (N) protein. The peptide analytical performance was evaluated according to ESI response, precision (triplicate) and linearity observed from tryptic digestion of pure proteins and cell cultured SARS-CoV-2 with and without prior precipitation.

**Table S2:** LC-MS analysis of S protein markers

| Peptide No. | Tryptic peptide | Molecular ion (Multiple charge) | Retention time (min) | Purified S protein |               |              | Cell-cultured SARS-CoV-2 |               |                                  | SARS-CoV-2 precipitation |               |                                  |
|-------------|-----------------|---------------------------------|----------------------|--------------------|---------------|--------------|--------------------------|---------------|----------------------------------|--------------------------|---------------|----------------------------------|
|             |                 |                                 |                      | Signal Intensity   | Precision (%) | Linearity    | Signal Intensity         | Precision (%) | Linearity (PFU/ml)               | Signal Intensity         | Precision (%) | Linearity (PFU/ml)               |
| 1           | LQSLQTYVTQQLIR  | 564.32107 (M+3H)/3              | 4.3                  | 1.2e6              | 12            | 10ppb-10ppm  | 9.8e4                    | 3             | 10 <sup>3</sup> -10 <sup>6</sup> | 2.1e5                    | 3             | 10 <sup>4</sup> -10 <sup>6</sup> |
| 2           | TQLPPAYTNSFTR   | 748.3806 (M+2H)/2               | 3.6                  | 3.2e5              | 67            | 1ppm-10ppm   | 3.8e4                    | 14            | 10 <sup>3</sup> -10 <sup>6</sup> | 1.2e4                    | 6             | —                                |
| 3           | IQDLSSTASALGK   | 689.3646 (M+2H)/2               | 3.4                  | 2e6                | 18            | 10ppb-10ppm  | 4.9e4                    | 11            | 10 <sup>4</sup> -10 <sup>6</sup> | 1.1e5                    | 7             | 10 <sup>4</sup> -10 <sup>6</sup> |
| 4           | VYSTGSNVFQTR    | 679.8386 (M+2H)/2               | 3.3                  | 8e5                | 5             | 100ppb-10ppm | 4.2e4                    | 19            | 10 <sup>3</sup> -10 <sup>6</sup> | 1.9e5                    | 11            | 10 <sup>3</sup> -10 <sup>6</sup> |
| 5           | LIANQFNSAIGK    | 638.3564 (M+2H)/2               | 3.6                  | 2e6                | 60            | 100ppb-10ppm | 8e4                      | 5             | 10 <sup>3</sup> -10 <sup>6</sup> | 1.7e5                    | 17            | 10 <sup>3</sup> -10 <sup>6</sup> |
| 6           | SFIEDLLFNK      | 613.32680 (M+2H)/2              | 4.7                  | 2.5e6              | 15            | 10ppb-10ppm  | 2.8e5                    | 5             | 10 <sup>4</sup> -10 <sup>6</sup> | 4.5e5                    | 30            | 10 <sup>4</sup> -10 <sup>6</sup> |
| 7           | GWIFGTTLDSK     | 612.8166 (M+2H)/2               | 4.3                  | 4.3e5              | 17            | 100ppb-10ppm | 1.2e5                    | 14            | 10 <sup>4</sup> -10 <sup>6</sup> | 2e5                      | 21            | 10 <sup>4</sup> -10 <sup>6</sup> |
| 8           | VGGNYNYLYR      | 609.7987 (M+2H)/2               | 3.5                  | 6.6e5              | 11            | 100ppb-10ppm | 4.9e4                    | 6             | 10 <sup>3</sup> -10 <sup>6</sup> | 1.6e5                    | 23            | 10 <sup>3</sup> -10 <sup>6</sup> |
| 9           | NTQEVFAQVK      | 582.3064 (M+2H)/2               | 3.3                  | 1.9e5              | 34            | 100ppb-10ppm | 6.4e3                    | 30            | —                                | 5.2e4                    | 3             | 10 <sup>3</sup> -10 <sup>6</sup> |
| 10          | ALTGIAVEQDK     | 572.8140 (M+2H)/2               | 3.3                  | 3.0e5              | 53            | 100ppb-10ppm | 5.0e3                    | 46            | —                                | 5.8e4                    | 2             | 10 <sup>3</sup> -10 <sup>6</sup> |
| 11          | FLPFQQFGR       | 570.3035 (M+2H)/2               | 4.2                  | 9.9e5              | 28            | 100ppb-10ppm | 1.7e5                    | 20            | 10 <sup>4</sup> -10 <sup>6</sup> | 6.3e5                    | 30            | 10 <sup>4</sup> -10 <sup>6</sup> |
| 12          | FASVYAWNR       | 557.2774 (M+2H)/2               | 3.7                  | 8e5                | 8             | 100ppb-10ppm | 4.1e4                    | 30            | 10 <sup>3</sup> -10 <sup>6</sup> | 1.1e5                    | 17            | 10 <sup>4</sup> -10 <sup>6</sup> |
| 13          | FQTLALHR        | 366.8854 (M+3H)/3               | 3.6                  | 1.7e6              | 7             | 100ppb-10ppm | 1.6e5                    | 24            | 10 <sup>4</sup> -10 <sup>6</sup> | 3.9e5                    | 30            | 10 <sup>4</sup> -10 <sup>6</sup> |
| 14          | GIYQTSNFR       | 543.2724 (M+2H)/2               | 3.2                  | 3.6e5              | 30            | 100ppb-10ppm | 3.7e4                    | 29            | 10 <sup>3</sup> -10 <sup>6</sup> | 1.0e5                    | 23            | 10 <sup>3</sup> -10 <sup>6</sup> |
| 15          | MSECVLGQSK      | 541.2544 (M+2H)/2               | 3.1                  | 1.3e5              | 68            | —            | —                        | —             | —                                | —                        | —             | —                                |
| 16          | DIADTTDAVR      | 538.7646 (M+2H)/2               | 3                    | 2.9e4              | 77            | 1ppm-10ppm   | 7.9e3                    | 32            | 10 <sup>3</sup> -10 <sup>6</sup> | 3.5e4                    | 15            | 10 <sup>3</sup> -10 <sup>6</sup> |

| Peptide No. | Tryptic peptide | Molecular ion (Multiple charge) | Retention time (min) | Purified S protein |               |              | Cell-cultured SARS-CoV-2 |               |                                  | SARS-CoV-2 precipitation |               |                                  |
|-------------|-----------------|---------------------------------|----------------------|--------------------|---------------|--------------|--------------------------|---------------|----------------------------------|--------------------------|---------------|----------------------------------|
|             |                 |                                 |                      | Signal Intensity   | Precision (%) | Linearity    | Signal Intensity         | Precision (%) | Linearity (PFU/ml)               | Signal Intensity         | Precision (%) | Linearity (PFU/ml)               |
| 17          | SWMESEFR        | 536.2318 (M+2H)/2               | 3.7                  | 3.6e5              | 14            | 100ppb-10ppm | 4.6e4                    | 1             | 10 <sup>5</sup> -10 <sup>6</sup> | 8.9e4                    | 15            | 10 <sup>5</sup> -10 <sup>6</sup> |
| 18          | VTLADAGFIK      | 517.7977 (M+2H)/2               | 3.9                  | 2.2e6              | 18            | 10ppb-10ppm  | 2.2e5                    | 13            | 10 <sup>4</sup> -10 <sup>6</sup> | 1.4e5                    | 29            | 10 <sup>4</sup> -10 <sup>6</sup> |
| 19          | VQPTESIVR       | 514.7904 (M+2H)/2               | 3.1                  | 9.7e5              | 50            | 100ppb-10ppm | 9.6e4                    | 1             | 10 <sup>4</sup> -10 <sup>6</sup> | 2e5                      | 7             | 10 <sup>4</sup> -10 <sup>6</sup> |
| 20          | SNLKPFER        | 330.8504 (M+3H)/3               | 2.8                  | 4.7e5              | 13            | 100ppb-10ppm | 5.3e4                    | 8             | 10 <sup>5</sup> -10 <sup>6</sup> | 6.5e4                    | 13            | 10 <sup>5</sup> -10 <sup>6</sup> |
| 21          | HTPINLVR        | 475.2825 (M+2H)/2               | 3                    | 1.5e6              | 10            | 100ppb-10ppm | 2.2e5                    | 13            | 10 <sup>4</sup> -10 <sup>6</sup> | 3.5e5                    | 16            | 10 <sup>4</sup> -10 <sup>6</sup> |
| 22          | QIAPGQTGK       | 450.2509 (M+2H)/2               | 2.5                  | 8.1e5              | 28            | 100ppb-10ppm | 5.1e4                    | 18            | 10 <sup>5</sup> -10 <sup>6</sup> | 2e5                      | 7             | 10 <sup>4</sup> -10 <sup>6</sup> |
| 23          | IADYNYK         | 443.71889 (M+2H)/2              | 2.9                  | 3.6e5              | 16            | 100ppb-10ppm | 4.8e4                    | 1             | 10 <sup>5</sup> -10 <sup>6</sup> | 8.3e4                    | 80            | 10 <sup>5</sup> -10 <sup>6</sup> |
| 24          | ASANLAATK       | 423.7376 (M+2H)/2               | 2.5                  | 2.9e6              | 17            | 10ppb-10ppm  | 5e4                      | 6             | 10 <sup>5</sup> -10 <sup>6</sup> | 1.8e5                    | 25            | 10 <sup>4</sup> -10 <sup>6</sup> |
| 25          | DLICAQK         | 395.7100 (M+2H)/2               | 3.1                  | 6.6e4              | 64            | 1ppm-10ppm   | —                        |               |                                  | —                        |               |                                  |

**Table S2:** LC-MS analysis of tryptic peptides derived from the Spike (S) protein. The peptide analytical performance was evaluated according to ESI response, precision (triplicate) and linearity observed from tryptic digestion of pure proteins and cell cultured SARS-CoV-2 with and without prior precipitation.

**Table S3:** Universality of S3 and S4 markers

| <b>peptide S3</b>       |                                     | <b>peptide S4</b>       |                                     |
|-------------------------|-------------------------------------|-------------------------|-------------------------------------|
| <b>peptide sequence</b> | <b>#occurrences<br/>(in 56,940)</b> | <b>peptide sequence</b> | <b>#occurrences<br/>(in 56,940)</b> |
| FKTLLALHR               | 11                                  | HTPIBLVR                | 1                                   |
| FQILLALHR               | 8                                   | HTPINL                  | 1                                   |
| FQPLLALHR               | 1                                   | HTPINLAR                | 9                                   |
| FQTLFALHR               | 9                                   | HTPINLLR                | 27                                  |
| FQTLA                   | 2                                   | HTPINLV                 | 50                                  |
| FQTLLAFHR               | 1                                   | <b>HTPINLVR</b>         | <b>55519</b>                        |
| FQTLLALH                | 9                                   | HTPINLXR                | 3                                   |
| FQTLLALHK               | 3                                   | HTPISLVR                | 1                                   |
| <b>FQTLLALHR</b>        | <b>55519</b>                        | HTPITLVR                | 1                                   |
| FQTLLALRR               | 1                                   | HTPIXLVR                | 2                                   |
| FQTLLALXR               | 7                                   | HTPIYLVR                | 2                                   |
| FQTLLALYR               | 24                                  | HTPJNLVR                | 1                                   |
| FQTLLAXHR               | 4                                   | HTPXNLVR                | 2                                   |
| FQTLLAXXR               | 1                                   | HTXINLVR                | 4                                   |
| FQTLLPFHR               | 2                                   | PINLVR                  | 14                                  |
| FQTLLSLHR               | 9                                   | QTPINLVR                | 2                                   |
| FQTLLVLHR               | 5                                   | TPINL                   | 1                                   |
| FQTLLXLHR               | 8                                   | TPINLVR                 | 14                                  |
| FQTLLXXHR               | 4                                   | TPXNLVR                 | 1                                   |
| FQTLPALHR               | 5                                   | <i>ND</i>               | 1285*                               |
| FQTLXALHR               | 1                                   |                         |                                     |
| FQTLXXLHR               | 10                                  |                         |                                     |
| FQTLXXXHR               | 1                                   |                         |                                     |
| FQTXLALHR               | 3                                   |                         |                                     |
| FQTXALHR                | 2                                   |                         |                                     |
| FQTXXLHR                | 2                                   |                         |                                     |
| FQXLLALH                | 1                                   |                         |                                     |
| FQXLLALHR               | 5                                   |                         |                                     |
| FRTLLALHR               | 3                                   |                         |                                     |
| FXTLLALHR               | 2                                   |                         |                                     |
| LLALHR                  | 3                                   |                         |                                     |
| QTLLALH                 | 1                                   |                         |                                     |
| QTLLALHR                | 7                                   |                         |                                     |
| TLLALHR                 | 11                                  |                         |                                     |
| YQTQTNSHR               | 14                                  |                         |                                     |
| <i>ND</i>               | 1241*                               |                         |                                     |

**Table S3:** Universality of markers S3 and S4. Variant sequences of peptides S3 and S4, and the extent of their occurrences in the 56,940 genomes retrieved from GISAID, present a high level of sequence identity (>97.5%). \* Truncated sequences in which the peptide region is missing

**Table S4:** Markers retention time stability

| Matrix                                      | Concentration | AYNVTQAFGR | GFYAEGSR | SFIEDLLFNK | FLPFQQFGR | FQTLALHR | HTPINLVR |
|---------------------------------------------|---------------|------------|----------|------------|-----------|----------|----------|
| purified proteins                           | 10ppm         | 3.55       | 2.92     | 4.68       | 4.16      | 3.59     | 3.01     |
|                                             | 1 ppm         | 3.52       | 2.88     | 4.69       | 4.18      | 3.61     | 3.03     |
|                                             | 0.1 ppm       | 3.53       | 2.89     | 4.70       | 4.17      | 3.61     | 3.03     |
| SARS-CoV-2 spiked into buffer               | 1e6 PFU/ml    | 3.52       | 2.87     | 4.70       | 4.16      | 3.58     | 3.00     |
|                                             | 1e5 PFU/ml    | 3.53       | 2.92     | 4.71       | 4.18      | 3.62     | 3.03     |
|                                             | 1e4 PFU/ml    | 3.53       | 2.88     | 4.71       | 4.20      | 3.60     | 3.04     |
| SARS-CoV-2 spiked into different NP samples | 1e5 PFU/ml    | 3.56       | 2.86     | 4.75       | 4.19      | 3.59     | 3.04     |
|                                             | 1e5 PFU/ml    | 3.49       | 2.85     | 4.68       | 4.19      | 3.58     | 3.01     |
|                                             | 1e6 PFU/ml    | 3.48       | 2.84     | 4.67       | 4.15      | 3.57     | 3.00     |
| stdv                                        |               | 0.03       | 0.03     | 0.02       | 0.02      | 0.02     | 0.02     |
| mean                                        |               | 3.52       | 2.88     | 4.70       | 4.18      | 3.59     | 3.02     |
| precision                                   |               | 0.7        | 1.0      | 0.5        | 0.4       | 0.5      | 0.5      |

**Table S4:** Retention time stability of markers in different matrix at different days and concentrations
